# Supplementary material for: Changes of skin collagen orientation associated with chronological aging as probed by polarized-FTIR micro-imaging
Source: Royal Society of Chemistry journal article supplement (doi:10.1039/c3an00353a), 2014-01-01

### Supplementary Information

**Figure 1S:** Average and standard deviation ( $n=20$ ) spectra of rat tail tendon in the 2500-3800  $\text{cm}^{-1}$  range in non-polarized mode (b), with IR radiation polarized perpendicular ( $\perp$ ) (a) and parallel ( $\parallel$ ) (c) to the x-axis of the motorized plate. The tendon was aligned along this x-axis direction.

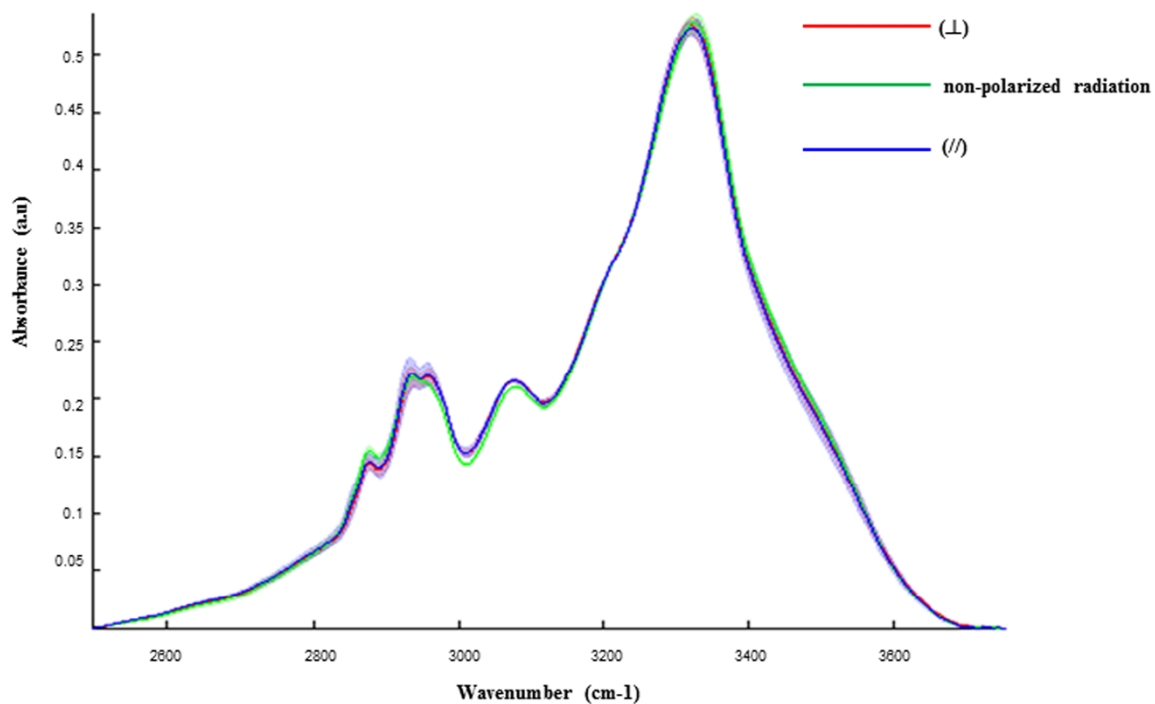

**Figure 2S:** Dendrogram corresponding to the color-coded HCA clustered images obtained for the 41(1) year old skin sample.

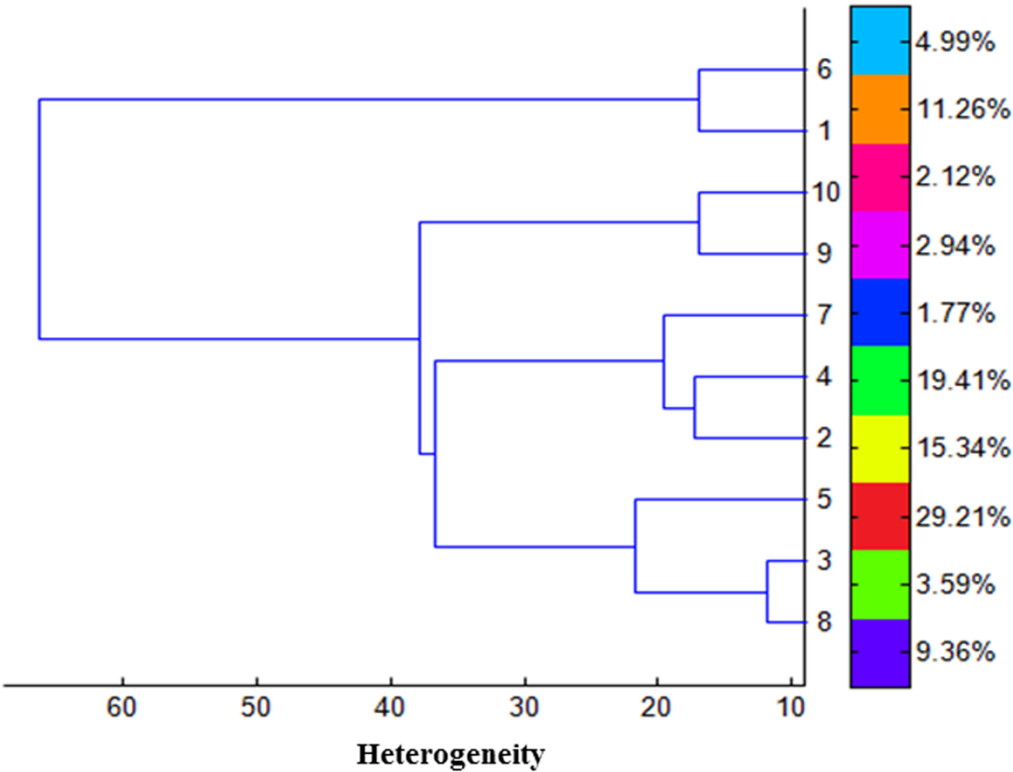

**Figure 3S:** Centroids (mean spectra and their standard deviation) of HCA clusters representative of the dermis. For each sample, three clusters were recovered.

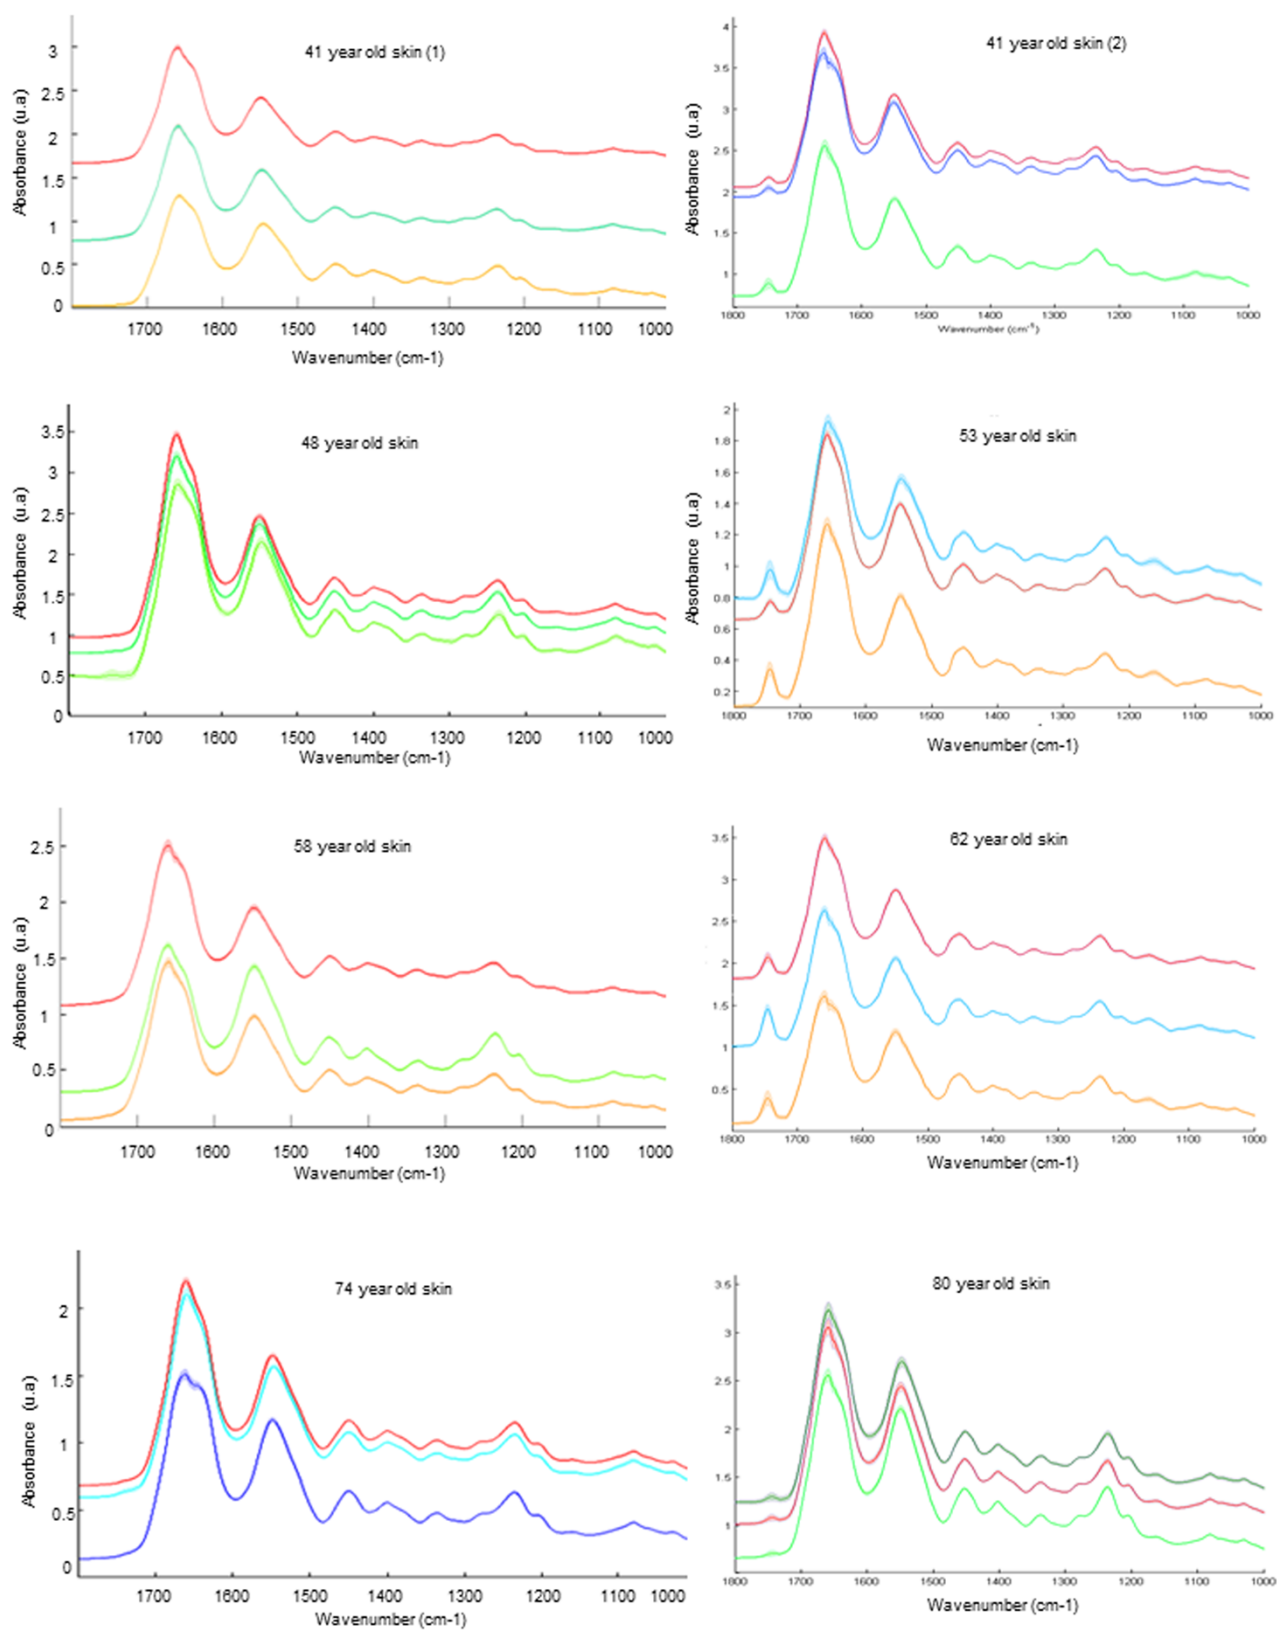

**Figure 4S:** SHG intensity for the eight skin samples of different age.

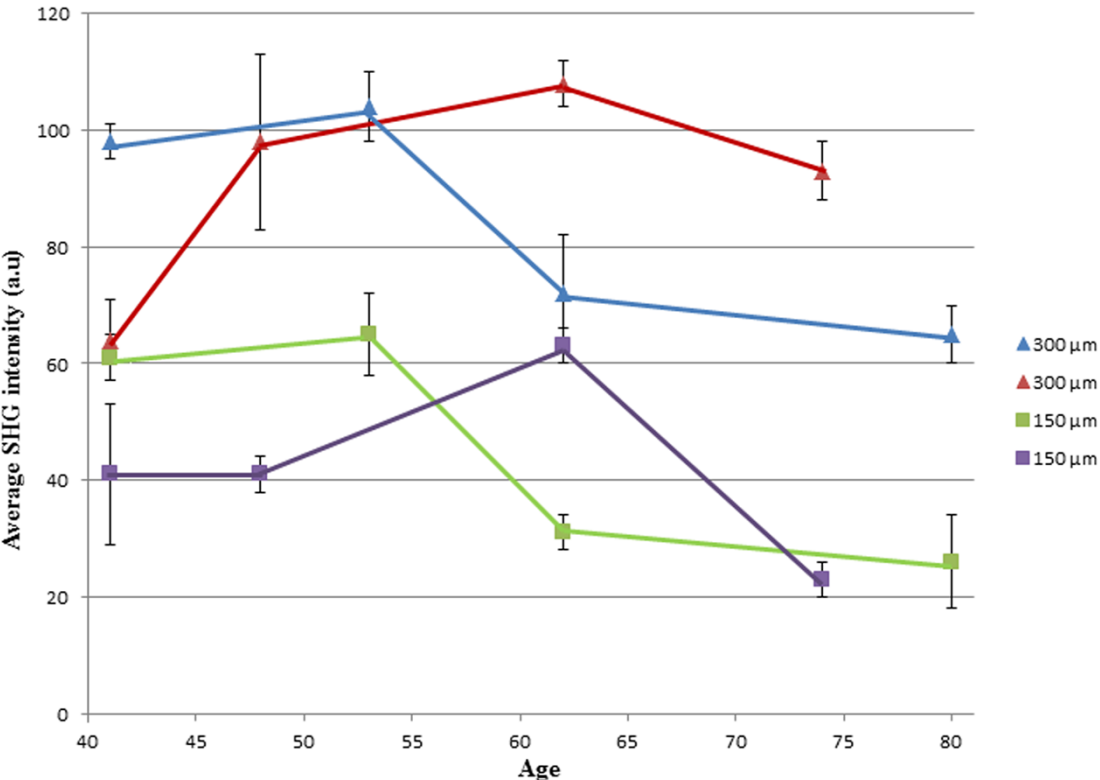

Supplement: c3an00353a1.pdf [file c3an00353a1.pdf]
